# Supplementary material
Source: PubMed Central journal article supplement (PMC10257005)
Supplement: mmc1.pdf [file mmc1.pdf]

## Supplemental information

### The clinical and molecular spectrum of the *KDM6B*-related neurodevelopmental disorder

Dmitrijs Rots, Taryn E. Jakub, Crystal Keung, Adam Jackson, Siddharth Banka, Rolph Pfundt, Bert B.A. de Vries, Richard H. van Jaarsveld, Saskia M.J. Hopman, Ellen van Binsbergen, Irene Valenzuela, Maja Hempel, Tatjana Bierhals, Fanny Kortüm, Francois Lecoquierre, Alice Goldenberg, Jens Michael Hertz, Charlotte Brasch Andersen, Maria Kibæk, Eloise J. Prijoles, Roger E. Stevenson, David B. Everman, Wesley G. Patterson, Linyan Meng, Charul Gijavanekar, Karl De Dios, Shenela Lakhani, Tess Levy, Matias Wagner, Dagmar Wieczorek, Paul J. Benke, María Soledad Lopez Garcia, Renee Perrier, Sergio B. Sousa, Pedro M. Almeida, Maria José Simões, Bertrand Isidor, Wallid Deb, Andrew A. Schmanski, Omar Abdul-Rahman, Christophe Philippe, Ange-Line Bruel, Laurence Faivre, Antonio Vitobello, Christel Thauvin, Jeroen J. Smits, Livia Garavelli, Stefano G. Caraffi, Francesca Peluso, Laura Davis-Keppen, Dylan Platt, Erin Royer, Lisette Leeuwen, Margje Sinnema, Alexander P.A. Stegmann, Constance T.R.M. Stumpel, George E. Tiller, Daniëlle G.M. Bosch, Stephanus T. Potgieter, Shelagh Joss, Miranda Splitt, Simon Holden, Matina Prapa, Nicola Foulds, Sofia Douzgou, Kaija Puura, Regina Waltes, Andreas G. Chiocchetti, Christine M. Freitag, F. Kyle Satterstrom, Silvia De Rubeis, Joseph Buxbaum, Bruce D. Gelb, Aleksic Branko, Itaru Kushima, Jennifer Howe, Stephen W. Scherer, Alessia Arado, Chiara Baldo, Olivier Patat, Demeer Bénédicte, Diego Lopergolo, Filippo M. Santorelli, Tobias B. Haack, Andreas Dufke, Miriam Bertrand, Ruth J. Falb, Angelika Rieß, Peter Krieg, Stephanie Spranger, Maria Francesca Bedeschi, Maria Iascone, Sarah Josephi-Taylor, Tony Roscioli, Michael F. Buckley, Jan Liebelt, Aditi I. Dagli, Emmelien Aten, Anna C.E. Hurst, Alesha Hicks, Mohnish Suri, Ermal Aliu, Sunil Naik, Richard Sidlow, Juliette Coursimault, Gaël Nicolas, Hanna Küpper, Florence Petit, Veyan Ibrahim, Deniz Top, Francesca Di Cara, Genomics England Research Consortium, Raymond J. Louie, Elliot Stolerman, Han G. Brunner, Lisenka E.L.M. Vissers, Jamie M. Kramer, and Tjitske Kleefstra

## Supplemental Figures and Legends

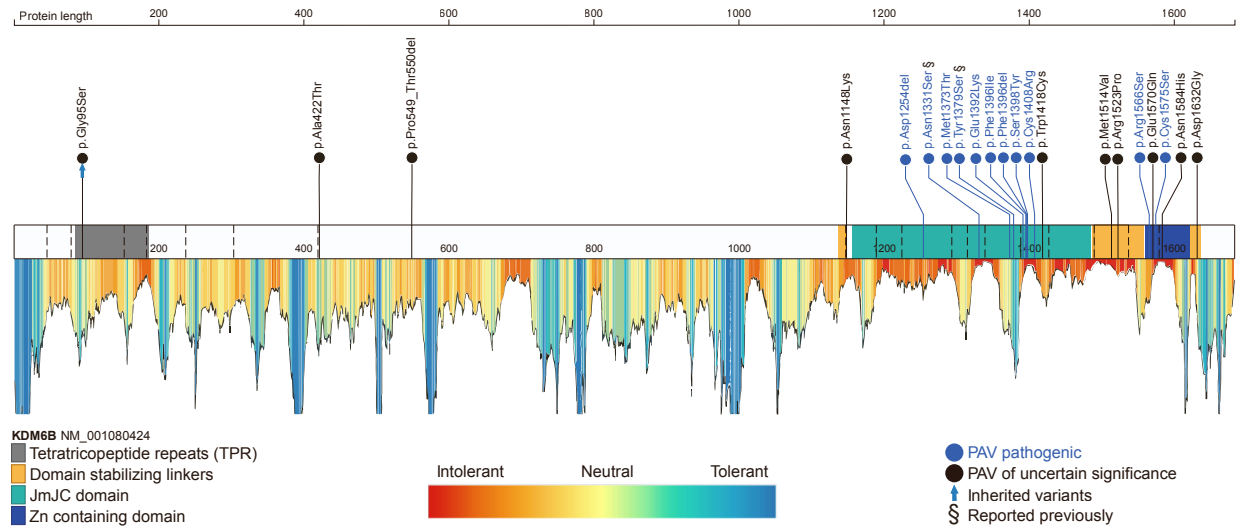

**Figure S1. Identified missense and in-frame variant distribution and positional tolerance of missense variants in the *KDM6B* gene.**

JmJC=Jumonji C domain; Zn=zinc; PTV=protein truncating (nonsense, frameshift, canonical splice) variants; PAV=protein altering (missense and in-frame indel) variants.

## Supplemental Acknowledgments

Funding to TEJ, TK, and JMK is indicated in the main text. Additional funding sources include: A Canadian Institutes of Health Research Project Grant (PJT 178220) to D.T. A U.S. National Institutes of Health (HL153009) to B.D.G. Autism Speaks, Hospital for Sick Children Foundation and the University of Toronto McLaughlin Centre to S.W.S. The Solve-RD project has received funding from the European Union's Horizon 2020 research and innovation program under grant agreement No 779257 to A.J., S.B., H.G.B. and L.E.L.M.V. Part of this study was funded by a grant from the French Ministry of Health (PHRC-I 18-38, REDIA study) and the European Union and Région Normandie in the context of Recherche Innovation Normandie (RIN2018). Europe gets involved in Normandie with the European Regional Development Fund (ERDF) to F.L., A.G., J.C., G.N. In2Genome project CENTRO-01-0247-FEDER-017800 and GenomePT project POCI-01-0145-FEDER-022184, both supported by the European Regional Development Fund (ERDF) to M.J.S. A CIHR grant FRN-178220 to D.T. and V.I. Research grants from the Japan Agency for Medical Research and Development (AMED) under Grant Nos. JP19km0405216, JP22tm0424222 and JP21wm0425007; the Japan Society for the Promotion of Science (JSPS) KAKENHI Grant Nos. 21K07543, 21H00194. The European commission (AIMS-2-TRIALS – 777394) to C.M.F. The European Reference Network on Rare Congenital Malformations and Rare Intellectual Disability (ERN-ITHACA). ERN-ITHACA is funded by the EU4Health program of the European Union, under the grant agreement number 101085231.

Part of this research was made possible through access to the data and findings generated by the 100KGP. The 100KGP is managed by Genomics England Limited (a wholly owned company of the Department of Health and Social Care). The 100KGP is funded by the National

Institute for Health Research and NHS England. The Wellcome Trust, Cancer Research UK and the Medical Research Council have also funded research infrastructure. The 100KGP uses data provided by patients and collected by the National Health Service as part of their care and support.
